# Supplementary material for: Human RIF1 and protein phosphatase 1 stimulate DNA replication origin licensing but suppress origin activation
Source: PubMed Central journal article supplement (PMC5331243; doi:10.15252/embr.201641983), 2017-01-11
Supplement: EMBR-18-403-s003.pdf [file EMBR-18-403-s003.pdf]

Manuscript EMBO-2016-41983

## **Human RIF1 and Protein Phosphatase 1 stimulate DNA replication origin licensing but suppress origin activation**

Shin-ichiro Hiraga, Tony Ly, Javier Garzón, Zuzana Hořejší, Yoshi-nobu Ohkubo, Akinori Endo, Chikashi Obuse, Simon J. Boulton, Angus I. Lamond, and Anne D. Donaldson

*Corresponding authors: Shin-ichiro Hiraga and Anne D. Donaldson, University of Aberdeen*

---

### **Review timeline:**

|                     |                  |
|---------------------|------------------|
| Submission Date:    | 28 July 2016     |
| Editorial Decision: | 25 August 2016   |
| Revision Received:  | 08 November 2016 |
| Accepted:           | 05 December 2016 |

---

Editor: Esther Schnapp

### **Transaction Report:**

(Note: With the exception of the correction of typographical or spelling errors that could be a source of ambiguity, letters and reports are not edited. The original formatting of letters and referee reports may not be reflected in this compilation.)

1st Editorial Decision

25 August 2016

---

Thank you for the submission of your manuscript to our journal. We have now received the full set of referee reports that is copied below as well as referee cross-comments.

As you will see, all referees acknowledge that the findings are interesting. They only raise a limited number of concerns, and I think that all of them should be addressed, except the major concerns of referee 3 as both referees 1 and 2 indicate in their cross-comments that this is not essential.

We would thus like to invite you to revise your manuscript with the understanding that the referee concerns must be fully addressed and their suggestions taken on board as outlined above. Please address all referee concerns in a complete point-by-point response. Acceptance of the manuscript will depend on a positive outcome of a second round of review. It is EMBO reports policy to allow a single round of revision only and acceptance or rejection of the manuscript will therefore depend on the completeness of your responses included in the next, final version of the manuscript.

---

### REFeree REPORTS

#### **Referee #1:**

The authors set out to investigate the molecular mechanism allowing for human RIF1's control of DNA replication. Evidence in yeast suggests RIF1 controls replication through targeting of PP1 phosphatase to antagonize the DDK phosphorylation of the MCM helicase required for replication origin activation making the authors investigation of this interaction in a mammalian system very logical. The author's construction of RIF1 cDNAs with mutations in motifs known to interact with PP1 is key to this manuscript. Manipulation of RIF1 expression using a combination of siRNA

knockdown and exogenous overexpression of GFP-tagged RIF1 cDNA and mutant GFP-tagged RIF1 cDNA allows the authors to gain a transient look at RIF1 interactions in a human cell line. The authors show that the exogenously expressed GFP-RIF1 cDNA in their system does interact with all three isoforms of human PP1 and the mutations in the PP1 binding motifs abolish these PP1 interactions. The authors demonstrate that, like in yeast, human RIF1 and its interaction with PP1 is required for prevention of hyper-phosphorylation of MCM4 and MCM2. The authors dive into the biochemistry of the RIF1-PP1 interaction and identify the key residues of MCM4 and MCM2 that RIF1 targeted PP1 acts upon. The authors continue by observing minor defects in DNA replication in RIF1 overexpressing cells and ascribe this observation to reduced helicase activation, yet overexpression of the RIF1-PP1 interaction mutant does not curb this observation as their hypothesis predicts. The authors show RIF1 overexpression exacerbates the replication defects observed using a DDK inhibitor, which requires RIF1-PP1 interaction. The author's main finding results from the observation that RIF1 knockdown reduces EdU incorporation, when ablation of a predicted replication inhibitor would likely increase incorporation. The authors show that ORC1 and MCM3 are destabilized on chromatin in G1 when RIF1 is depleted, suggesting a role for human RIF1 in pre-RC preservation. The authors show that ORC1 and MCM3 chromatin stabilization is dependent on PP1 and proteasome action. The authors then hypothesize that inter-origin distances will be affected in RIF1 knockout cells and observe a slight increase by DNA fiber analysis.

Overall the authors fill two gaps in the literature with this paper: 1. They confirm in humans much of which has been observed in yeast, which lends to RIF1's conserved and important role in genome regulation. 2. They observe a new role for RIF1 in origin stabilization, which adds another chapter to the ever-growing RIF1 tome. I believe the intellectual merit of this paper is high and it should be accepted for publication, yet there are issues that will make the paper stronger, as outlined below.

- The cell line expressing mutant RIF1 defective for PP1 interaction is a very strong tool and is utilized well in the first part of the paper, but is forgotten in the second half. Overexpression of mutant RIF1 and knockdown of endogenous RIF1 would be very useful in showing RIF1-PP1 interactions are required for origin stabilization as much of the data provided relies on broad-spectrum PP1 inhibitors. These data would significantly strengthen the novel findings in this paper.
- Figure 7 - Actual pictures of the DNA fiber analysis would be helpful to interpret the extent to which RIF1 is affecting inter-origin distances. We also need to see the average size of all fibers for all experiments as that can strongly bias IOD calculations.
- Figure 1C - IP of endogenous RIF1 would provide a more convincing figure. PP1 isoform interactions seem very weak in the GFP-RIF1 cDNA, is this interaction similar to endogenous RIF1?
- The discussion tries to connect RIF1's control of replication timing to origin stabilization and possibly allow for more MCM complexes loaded at each origin, thus making these origins fire earlier, yet RIF1 binds mainly to late replicating domains according to ChIP data in Foti et al., (2016). The provided model could use revision to address how RIF1 might act at different chromatin domains to influence replication timing.

#### Minor Comments:

Table 1 – any way of knowing which PP1 isoform is acting at which residues?  
Figure 4 - Why MCM3? 2 and 4 focused on previously

#### **Referee #2:**

This very clearly written paper studies the role of human RIF1 in the regulation of DNA replication. The question is important and appropriate for EMBO Reports and the experimented use state-of-the-art analyses to probe the regulation of DNA replication by RIF1. The main findings build on previous observations suggesting that RIF1 regulates replication initiation by interacting with PP1 phosphatase. The current submission demonstrates that the RIF1 protein interacts with all 3 isoforms of PP1 and recruits the phosphatase to pre-replication complexes. On chromatin, PP1 counters the phosphorylation of MCM, the replicative helicase, and ORC1, a member of the ORC complex required for preparing replication origins for initiation of DNA replication. Limiting MCM helicase phosphorylation prevents premature activation of the helicase and delays DNA replication. Limiting ORC1 phosphorylation prevents premature degradation of ORC1 and increases the frequency of

licensed origins. Hence, depletion of RIF1, in concert with inhibition of PP1, concomitantly deregulates the replication timing program and limits the abundance of activated replication origins. These observations provide a mechanistic basis for the reported roles of RIF1 in regulating replication timing and affecting genomic stability. I find the paper very interesting as it reports a significant advance of potential importance.

Several technical issues need to be addressed, as listed below:

1 / Figure 2B, lane 4: cells contain no RIF1 and were not exposed to DOX. Why do these cells contain a reduced level of S40 phosphorylated MCM2? Shouldn't these cells and the cells analyzed in lanes 2 and 6 phosphorylate S40 with a similar efficiency? Is the reduction reproducible?

2 / Figure 3C: do all cells treated with XL413 without siRIF1 incorporate EdU, or is the baseline of the "+GFP only" curve skewed to the right?

3 / Figure 6: depletion of RIF1 is reported to cause "statistically significant" increase in the median inter-origin distance. How significant was the change - can a p-value be calculated? Was the change accompanied by a change in replication fork progression as reported in other instances of reduced origin frequency, or was there a different effect due to the concomitant effects on replication timing? This point should at least be discussed.

#### Minor issues:

1/ It seems from the Methodology section that all the experiments reported in the main text were performed in the engineered Flp-in 293 system, but most figure legends do not state the source of the cells explicitly.

2/ Why were MEFs used in figure S5A, and what is the significance of their relative resistance compared to 293 cells? Is this a species difference or an effect of tissue culture adaptations? If the authors consider this an important observation, it might be good to discuss further.

#### **Referee #3:**

In this manuscript Hiraga et al investigate how human Rif1 affects DNA replication. In the first section they find that the PP1 dependent mechanism of Rif1 control is conserved between yeast and human and showed that all of the PP1 isoforms interact with Rif1 and consistently also displayed overlap in their activities. Then the authors go on and investigate the consequences of Rif1 overexpression and find synergistic effects with XL413 mediated DDK inhibition on DNA synthesis, consistent with the idea that Rif1 and DDK acts in the same pathway and work via PP1. These observations are important, as they clearly define the regulatory principles that control this system. In the second part the authors investigate the curious observation that RNAi mediated knockdown of Rif1 has a significant impact on the Orc1 phosphorylation levels, Orc1 stability and MCM2-7 loading. The authors observed that degradation of phosphorylated Orc1 through the known proteasome pathway is hyperactive in the absence of Rif1, as dephosphorylating of Orc1 is reduced. Crucially, Orc1 acts not only in replication, but also for heterochromatin formation and in regulating cilia formation, thus the implications are manifold. Moreover, reduced loading of the replicative helicase core complex MCM2-7 is known to affect DNA synthesis only mildly, as each cell cycle an excess of MCM2-7 becomes loaded on DNA, which serves as dormant origins. These origins have important functions in case of replication fork blockage and allow in this case reestablishment of replication forks. In the absence of dormant origins cells become hypersensitive to DNA damage, as they have no way to reload their helicase during ongoing S-phase. In particular stem cells are hypersensitive to dormant origin interference. Understanding the circuits that regulate loading of MCM2-7 have therefore major importance for a large number of scientists and clinicians. However, the levels of MCM2-7 loading have also been suggested to affect the timing of replication (Nick Rhind), therefore this is an important knowledge, which needs to be considered when interpreting the manifold studies that study the role of Rif1 in replication timing. To enhance this 2nd part of the work, and a few other sections, I would suggest the following major and minor modifications.

Major concerns:

A key finding is that Orc1 becomes protected from degradation through Rif1 and PP1 mediated de-phosphorylation. However, the mechanism is not clear. How are Rif1/PP1 being recruited to Orc1? What amino acids in Orc1 become phosphorylated upon Rif1 knockdown? Does mutating these sites have an influence on MCM2-7 loading or cell cycle progression? Answering at least some of these questions would enhance the manuscript.

Minor points:

- Figure 1B. It would be easier to judge the nuclear localisation if the DAPI image is shown as well.
- Figure 1C, The Rif1 IP shows weak bands for PP1 a,b,c, but to judge the background binding towards Rif1-pp10bs a longer exposure would be useful.
- The quality of the work is in general very high, but I wonder if a single siRNA is sufficient to exclude off target effects.
- Figure 2B. The authors have no loading control. Having this, or a ponceau stain would make the comparison easier.
- Figure 4. Could the authors show what happens to Cdc6, geminin and Cdt1 - as these factors also regulate MCM2-7 loading
- Figure 4D. Some of the effects are less pronounced. Is this due to transfection efficiencies? Could this be discussed?
- Figure 6 or supplementary figures. I wonder if it would be useful to test a panel of DNA damaging drugs in the cells used here to showcase the effect of Rif1 depletion on cell growth, DNA content and DNA synthesis rates using DNA combing.
- Figure S2 and S3A appear to miss the gel sections. S3B shows the identical figure as in Fig.2C. I would recommend to describe this clearly in the figure legend.

1<sup>st</sup> Revision - authors' response

08 November 2016

We thank the Reviewers for their interest in the work and their useful comments, which we address below (in italics):

**Referee #1:**

The authors set out to investigate the molecular mechanism allowing for human RIF1's control of DNA replication. Evidence in yeast suggests RIF1 controls replication through targeting of PP1 phosphatase to antagonize the DDK phosphorylation of the MCM helicase required for replication origin activation making the authors investigation of this interaction in a mammalian system very logical. The author's construction of RIF1 cDNAs with mutations in motifs known to interact with PP1 is key to this manuscript. Manipulation of RIF1 expression using a combination of siRNA knockdown and exogenous overexpression of GFP-tagged RIF1 cDNA and mutant GFP-tagged RIF1 cDNA allows the authors to gain a transient look at RIF1 interactions in a human cell line. The authors show that the exogenously expressed GFP-RIF1 cDNA in their system does interact with all three isoforms of human PP1 and the mutations in the PP1 binding motifs abolish these PP1 interactions. The authors demonstrate that, like in yeast, human RIF1 and its interaction with PP1 is required for prevention of hyper-phosphorylation of MCM4 and MCM2. The authors dive into the biochemistry of the RIF1-PP1 interaction and identify the key residues of MCM4 and MCM2 that RIF1 targeted PP1 acts upon. The authors continue by observing minor defects in DNA replication in RIF1 overexpressing cells and ascribe this observation to reduced helicase activation, yet overexpression of the RIF1-PP1 interaction mutant does not curb this observation as their hypothesis predicts. The authors show RIF1 overexpression exacerbates the replication defects observed using a DDK inhibitor, which requires RIF1-PP1 interaction. The author's main finding results from the observation that RIF1 knockdown reduces EdU incorporation, when ablation of a predicted replication inhibitor would likely increase incorporation. The authors show that ORC1 and MCM3 are destabilized on chromatin in G1 when RIF1 is depleted, suggesting a role for human RIF1 in pre-RC preservation. The authors show that ORC1 and MCM3 chromatin stabilization is dependent on PP1 and proteasome action. The authors then hypothesize that inter-origin distances will be affected in RIF1 knockout cells and observe a slight increase by DNA fiber analysis.

Overall, the authors fill two gaps in the literature with this paper: 1. They confirm in humans much of which has been observed in yeast, which lends to RIF1's conserved and important role in genome regulation. 2. They observe a new role for RIF1 in origin stabilization, which adds another chapter to the ever-growing RIF1 tome. I believe the intellectual merit of this paper is high and it should be accepted for publication, yet there are issues that will make the paper stronger, as outlined below.

- The cell line-expressing mutant RIF1 defective for PP1 interaction is a very strong tool and is utilized well in the first part of the paper, but is forgotten in the second half. Overexpression of mutant RIF1 and knockdown of endogenous RIF1 would be very useful in showing RIF1-PP1 interactions are required for origin stabilization as much of the data provided relies on broad-spectrum PP1 inhibitors. These data would significantly strengthen the novel findings in this paper.

*This is a very good suggestion. We have added a panel ('Extended View' Fig. EV3A in the revised version) quantifying the effect on licensing of RIF1 depletion with or without induction of GFP-RIF1 or RIF-pp1bs, assessed by measuring chromatin-associated MCM4 in western blot experiments. We find that RIF1 depletion mildly but reproducibly impairs licensing, and that this effect is rescued by induction of GFP-RIF1 but not GFP-RIF1pp1bs. This result is as predicted by our model, in which RIF1 promotes origin licensing by directing PP1 to dephosphorylate and stabilize ORC1. The effect is small when looking by western blotting at all cells in the population, and we would have liked to examine the effects in relation to cell cycle stage. We did attempt this experiment by examining the effect of RIF1 depletion with GFP-RIF1/GFP-RIF1pp1bs induction using flow cytometry of MCM3 in permeabilised DAPI-stained cells. Unfortunately however, we have been unable to obtain satisfactory results when using the cell cycle analysis-flow cytometry method with our induced GFP-RIF1 system for this experiment. (Probably for reasons to do with heterogeneity of expression level of the induced protein, we found that a high degree of scatter makes the results of such experiments uninterpretable.)*

- Figure 7 - Actual pictures of the DNA fiber analysis would be helpful to interpret the extent to which RIF1 is affecting inter-origin distances. We also need to see the average size of all fibers for all experiments as that can strongly bias IOD calculations.

*We have completely revised this Figure (now Fig. 6), and now present a new, more complete set of data, examining the effect on IOD both when replication is unimpeded and in the presence of Hydroxyurea to examine the effect of RIF1 depletion on dormant origins. We also now include specimen pictures of our fiber analyses. The substantially revised text describing this Figure is on pages 13-14 of the Revised Manuscript. The histogram now shown in Fig. 6B provides a much more detailed view of the distribution of inter-origin distances. We are not clear however exactly what the Reviewer means by 'average size of all fibers'. In these experiments the fibers examined are generally a few hundred kb in length, but the precise end-to-end length of each fiber being analysed is not a number easily obtained in such fiber methods. While the fiber size will indeed affect measurements (since you obviously can't detect an IOD greater than the fibre size), there's no reason to expect a different average fibre size in control and RIF1-depleted cells, so the differences we see are still valid. We now discuss on page 15 the implications for our results of the fact that fiber analyses can assess local effects on replication initiation, but not effects on entire origin clusters or chromosome domains.*

- Figure 1C - IP of endogenous RIF1 would provide a more convincing figure. PP1 isoform interactions seem very weak in the GFP-RIF1 cDNA, is this interaction similar to endogenous RIF1?

*We can IP endogenous RIF1, but despite several attempts have been unable to detect PP1 in the IP samples, as now explained towards the bottom of page 5 of the revised manuscript. We suspect that this result reflects the fact that many different PP1-interacting proteins compete for a limited pool of human PP1 proteins, so that RIF1 overexpression is needed for the amount of PP1 recovered in IP samples to be above our detection threshold. An alternative possibility is that the RIF1 epitope recognized by the antibody we used for IP is masked in the fraction of RIF1 that interacts with PP1 (and indeed, we were only able to pull down around 50% of endogenous RIF1, with a significant proportion remaining in the supernatant despite an excess of antibody). As now covered towards the bottom of page 5, several large-scale analyses of the PP1 interactome already identified endogenous RIF1 as binding to PP1 under physiological conditions, confirming that the interaction*

*we observe in Fig. 1 C does reflect a genuine biological interaction. For example, one investigation from co-author Angus Lamond's lab identified RIF1 as associating with PP1 that was isolated using microcystin-coupled beads (Moorhead et al, 2008). We now mention these earlier studies to clarify the situation (bottom of Page 5). Taken together with our GFP-RIF1 pull-down experiment presented in this manuscript, we believe that RIF1-PP1 interaction has been well demonstrated.*

- The discussion tries to connect RIF1s control of replication timing to origin stabilization and possibly allow for more MCM complexes loaded at each origin, thus making these origins fire earlier, yet RIF1 binds mainly to late replicating domains according to ChIP data in Foti et al., (2016). The provided model could use revision to address how RIF1 might act at different chromatin domains to influence replication timing.

*The Discussion has been completely rewritten and now covers the relationship to previous replication timing studies more explicitly. We suggest a specific model for how RIF1 might affect both replication licensing and replication timing, on pages 16-17.*

#### Minor Comments:

Table 1 – any way of knowing which PP1 isoform is acting at which residues?

*There's no way to know this from our existing data. To address this issue properly it would be necessary to carry out proteomic analysis on cells depleted for the individual siPP1 isoforms, which would represent a considerable undertaking beyond the scope of this manuscript. (And in practice, the likelihood that isoforms can substitute or compensate for one another, see Appendix Fig. S1, means that to draw clear conclusions it would probably be necessary to carry out proteomic analyses in two-way compared to three-way depleted cells, to enable analysis of effects when just a single PP1 isoform is present.)*

Figure 4 - Why MCM3? 2 and 4 focused on previously

*Based on the proteomic results summarized in Fig. 4A we presume that that all six MCMs behave similarly in terms of loading at origins. We focused in MCM3 in the flow cytometry analyses for technical reasons: First, flow cytometry analysis of MCM3 chromatin association was shown to work well, using the antibody we have utilised, in the paper that established the method (Ref 41: Haland et al 2015). Second, since MCM4 is strongly phosphorylated, we were concerned by the possibility that altered phosphorylation level might affect antibody detection and therefore quantification using the flow cytometry approach.*

#### **Referee #2:**

This very clearly written paper studies the role of human RIF1 in the regulation of DNA replication. The question is important and appropriate for EMBO Reports and the experimented use state-of-the-art analyses to probe the regulation of DNA replication by RIF1. The main findings build on previous observations suggesting that RIF1 regulates replication initiation by interacting with PP1 phosphatase. The current submission demonstrates that the RIF1 protein interacts with all 3 isoforms of PP1 and recruits the phosphatase to pre-replication complexes. On chromatin, PP1 counters the phosphorylation of MCM, the replicative helicase, and ORC1, a member of the ORC complex required for preparing replication origins for initiation of DNA replication. Limiting MCM helicase phosphorylation prevents premature activation of the helicase and delays DNA replication. Limiting ORC1 phosphorylation prevents premature degradation of ORC1 and increases the frequency of licensed origins. Hence, depletion of RIF1, in concert with inhibition of PP1, concomitantly deregulates the replication timing program and limits the abundance of activated replication origins. These observations provide a mechanistic basis for the reported roles of RIF1 in regulating replication timing and affecting genomic stability.

I find the paper very interesting as it reports a significant advance of potential importance. Several technical issues need to be addressed, as listed below:

1/ Figure 2B, lane 4: cells contain no RIF1 and were not exposed to DOX. Why do these cells contain a reduced level of S40 phosphorylated MCM2? Shouldn't these cells and the cells analyzed in lanes 2 and 6 phosphorylate S40 with a similar efficiency? ? Is the reduction reproducible?

*This effect on MCM2 Serine 40 phosphorylation is not reproducible, as now shown in a biological repeat of this experiment presented as Fig. EV1 (and mentioned in the text on page 6).*

2 / Figure 3C: do all cells treated with XL413 without siRIF1 incorporate EdU, or is the baseline of the "+GFP only" curve skewed to the right?

*Comparing this histogram in Fig. 3C with the 2-dimensional plots of the same data shown in Fig. EV2B (panel i), it becomes clear that this apparent 'skew' is caused by cells struggling to finish (not start) S phase. The fact that DDK inhibition leads to a buildup of cells in late S phase has been previously described in ref 40 (Koltun et al 2012). Interestingly, RIF1 removal partially suppresses this effect also, as is clear from inspection of Fig. EV2B panel ii, further confirming that DDK and RIF1 act in opposition in S phase control. We now explicitly mention this aspect of the data, close to the top of page 9.*

3 / Figure 6: depletion of RIF1 is reported to cause "statistically significant" increase in the median inter-origin distance. How significant was the change - can a p-value be calculated?

*We now include this p-value in the revised text on page 13 ( $p = 0.001$ ).*

Was the change accompanied by a change in replication fork progression as reported in other instances of reduced origin frequency, or was there a different effect due to the concomitant effects on replication timing? This point should at least be discussed.

*We have measured fork speed in our fiber experiments and find that siRIF1 does not have a significant effect, as now presented in Fig. EV4B. As explained in our response to Reviewer 1, we have now provided a more complete and detailed dataset analyzing effects on origin frequency (in revised Fig. 6). In the revised Discussion we also now provide a more detailed Discussion of the relationship of changes in IOD to other effects of RIF1, in particular effects on EdU incorporation (bottom half of page 15) and on replication timing (page 16).*

#### Minor issues:

1/ It seems from the Methodology section that all the experiments reported in the main text were performed in the engineered Flp-in 293 system, but most figure legends do not state the source of the cells explicitly.

*We now state explicitly the cell line being used, in each legend.*

2/ Why were MEFs used in figure S5A, and what is the significance of their relative resistance compared to 293 cells? Is this a species difference or an effect of tissue culture adaptations? If the authors consider this an important observation, it might be good to discuss further.

*We have removed both of the Supplementary Figures that showed analyses of MEF cells, as they did not make any major points and indeed raised questions about how the results related to those in the rest of the paper, which describe effects in human cell lines.*

#### **Referee #3:**

In this manuscript Hiraga et al investigate how human RIF1 affects DNA replication. In the first section they find that the PP1 dependent mechanism of RIF1 control is conserved between yeast and human and showed that all of the PP1 isoforms interact with RIF1 and consistently also displayed overlap in their activities. Then the authors go on and investigate the consequences of RIF1 overexpression and find synergistic effects with XL413 mediated DDK inhibition on DNA synthesis, consistent with the idea that RIF1 and DDK acts in the same pathway and work via PP1. These observations are important, as they clearly define the regulatory principles that control this

system. In the second part the authors investigate the curious observation that RNAi mediated knockdown of RIF1 has a significant impact on the ORC1 phosphorylation levels, ORC1 stability and MCM2-7 loading. The authors observed that degradation of phosphorylated ORC1 through the known proteasome pathway is hyperactive in the absence of RIF1, as dephosphorylation of ORC1 is reduced. Crucially, ORC1 acts not only in replication, but also for heterochromatin formation and in regulating cilia formation, thus the implications are manifold. Moreover, reduced loading of the replicative helicase core complex MCM2-7 is known to affect DNA synthesis only mildly, as each cell cycle an excess of MCM2-7 becomes loaded on DNA, which serves as dormant origins. These origins have important functions in case of replication fork blockage and allow in this case reestablishment of replication forks. In the absence of dormant origins cells become hypersensitive to DNA damage, as they have no way to reload their helicase during ongoing S-phase. In particular stem cells are hypersensitive to dormant origin interference. Understanding the circuits that regulate loading of MCM2-7 have therefore major importance for a large number of scientists and clinicians. However, the levels of MCM2-7 loading have also been suggested to affect the timing of replication (Nick Rhind), therefore this is an important knowledge, which needs to be considered when interpreting the manifold studies that study the role of RIF1 in replication timing.

*We agree that the effects on MCM loading might well impact on replication timing, and on page 17 of the Discussion (second paragraph) we now cover the results from the Rhind lab concerning the relationship between RIF1 depletion, replication timing and MCM loading.*

To enhance this 2nd part of the work, and a few other sections, I would suggest the following major and minor modifications.

#### Major concerns:

A key finding is that ORC1 becomes protected from degradation through RIF1 and PP1 mediated dephosphorylation. However, the mechanism is not clear. How are RIF1/PP1 being recruited to ORC1? What amino acids in ORC1 become phosphorylated upon RIF1 knockdown?

*Detailed dissection of the mechanism is beyond the scope of this study, especially as the phosphorylation sites that direct ORC1 destruction have not yet been identified. We do now mention in the Discussion the interesting proximity of ORC1 Ser273, one of the phosphorylation sites that is substantially affected by RIF1, to a consensus Destruction box and a PP1 interaction motif. We outline the potential significance of the juxtaposition of these three features on pages 15-16.*

Does mutating these sites have an influence on MCM2-7 loading or cell cycle progression?

*This is a very interesting question, but setting up ORC1 CRISPR-based mutagenesis or an ORC1 replacement system would require the establishment and characterization of a new set of cell lines, which would take many months and is beyond the scope of this study.*

Answering at least some of these questions would enhance the manuscript.

#### Minor points:

Figure 1B. It would be easier to judge the nuclear localisation if the DAPI image is shown as well.

*We have replaced all the panels in Fig. 1B and now include a DAPI image.*

Figure 1C, The RIF1 IP shows weak bands for PP1 a,b,c, but to judge the background binding towards RIF1-pp10bs a longer exposure would be useful.

*The detection system employed here was a cooled-CCD camera-based system with ECL substrate. Although it is a high sensitivity system, obtaining data as in Fig. 1C almost hits its detection limit. The Figure shows a 15 min exposure, and extending the exposure time further is not practical due to background noise caused by environmental heat. As these conditions produce no visible bands or background signal in the RIF1pp1bs pull-down lanes, we conclude that there's no background binding at any detectable level. As explained in our reply to Reviewer 1 and discussed on page 5 of*



*the manuscript, we suspect that the low level of PP1 reflects the fact that many different PP1-interacting proteins compete for actually quite a limited pool of human PP1 proteins.*

The quality of the work is in general very high, but I wonder if a single siRNA is sufficient to exclude off target effects.

*The synonymous mutations in the siRNA-resistant RIF1 construct mean that we have no flexibility in design of siRIF1 RNAs. However, the fact that the GFP-RIF1 complements the phenotypes tested (Fig. 2A (ii), Fig. EV3A) implies that observations are not due to off-target effects.*

Figure 2B. The authors have no loading control. Having this, or a ponceau stain would make the comparison easier.

*Indeed in the original manuscript we had overlooked to explain how we ensured equivalent loading in all lanes, which is now explained on pages 20-21. We also now include a protein loading control panel in the (new) Fig. EV1, which shows a biological repeat of the experiment of Fig. 2B.*

Figure 4. Could the authors show what happens to Cdc6, geminin and Cdt1 - as these factors also regulate MCM2-7 loading.

*We have tested for effects of RIF1 depletion on the cell cycle control mechanisms operating on Cdc6 and Cdt1. We present the results in Fig. EV5, and close to the top of page 16 we explain that RIF1 does not seem to have a major effect on either protein. Although geminin has been reported to be phosphorylated, we are not aware of any evidence that geminin's activity in replication control is regulated by phosphorylation, and so have no clear prediction to test about how geminin might be affected by RIF1-PP1.*

Figure 4D. Some of the effects are less pronounced. Is this due to transfection efficiencies? Could this be discussed?

*RIF1 depletion does reproducibly affect MCM loading (Fig. 4C & Fig. EV3E) to a greater extent than it does ORC1 loading (Fig. 4D). Given that one ORC complex is believed to load multiple MCMs, it is as expected that MCM loading is generally more seriously affected than ORC1 loading, as now explained on page 15 lines 1-3. Differing transfection efficiencies between the HEK293 and HeLa-based cell lines may indeed cause variation between experiments, as now mentioned on page 12 (lines 8-9, in the Discussion of Fig.4.)*

Figure 6 / supplementary figures: I wonder if it would be useful to test a panel of DNA damaging drugs in the cells used here to showcase the effect of RIF1 depletion on cell growth, DNA content and DNA synthesis rates using DNA combing.

*This is an interesting suggestion, but it is unclear what information DNA combing/fibre analysis would provide about cell growth, DNA content, or even overall DNA synthesis rate. It is certainly true that RIF1 is emerging as involved in the control of pathways affected by various DNA damaging drugs (-- including UFB resolution [Hengeveld et al Dev Cell 2015 34: 466 ref 65]; DSB repair [Chapman et al 2013 Mol. Cell 49: 858 ref 62; Zimmermann et al 2013 Science 339: 700 ref 64; Feng et al 2013 JBC 288: 11135 ref 64; Escobedo-Diaz et al 2013 Mol Cell 49: 872 ref 34]; and fork protection [Chaudhuri et al Nature 2016 535: 382]). Partly because of the complex effects of RIF1 in these interrelated pathways, if it were to be done properly the screen being suggested here would represent a very substantial study, involving many assays other than simply combing. In fact to be useful this investigation would in effect form an entire separate study, involving dissection of multiple aspects of RIF1 biological function whose elucidation lies beyond the scope of this study.*

Figure S2 and S3A appear to miss the gel sections. S3B shows the identical figure as in Fig.2C. I would recommend describing this clearly in the figure legend.

*The Supplementary Figure panels mentioned are all taken from the main Figures, and are reproduced in the Supplementary (now 'Appendix') Figures simply to help clarify exactly what is being quantitated. Those in original Fig S2 (now Appendix Fig. S1) are from Fig. 2B (i) lower left*

*panels, while those in original Fig. S3 (now Appendix Fig. S2) are from the Fig. 2B upper (MCM4) panels. We now state this clearly in the Appendix Figure legends.*

2nd Editorial Decision

5 December 2016

---

I am very pleased to accept your manuscript for publication in the next available issue of EMBO reports. Thank you for your contribution to our journal.

---

#### REFEREE REPORTS

##### **Referee #1:**

The authors have now addressed all of my criticisms satisfactorily. I look forward to the opportunity to cite this interesting work presenting a novel role for Rif1 in regulating DNA replication.

##### **Referee #2:**

The revision has addressed all my concerns and the main concerns of the other reviewer, I recommend publication in the current form.

YOU MUST COMPLETE ALL CELLS WITH A PINK BACKGROUND

PLEASE NOTE THAT THIS CHECKLIST WILL BE PUBLISHED ALONGSIDE YOUR PAPER

Corresponding Author Name: Shin-ichiro Hiraga and Anne D. Donaldson

Journal Submitted to: EMBO Reports

Manuscript Number: EMBOR-2016-41983V3

**Reporting Checklist for Life Sciences Articles (Rev. July 2015)**

This checklist is used to ensure good reporting standards and to improve the reproducibility of published results. These guidelines are consistent with the Principles and Guidelines for Reporting Preclinical Research issued by the NIH in 2014. Please follow the journal's authorship guidelines in preparing your manuscript.

**A- Figures****1. Data****The data shown in figures should satisfy the following conditions:**

- the data were obtained and processed according to the field's best practice and are presented to reflect the results of the experiments in an accurate and unbiased manner.
- figure panels include only data points, measurements or observations that can be compared to each other in a scientifically meaningful way.
- graphs include clearly labeled error bars for independent experiments and sample sizes. Unless justified, error bars should not be shown for technical replicates.
- if n < 5, the individual data points from each experiment should be plotted and any statistical test employed should be justified
- Source Data should be included to report the data underlying graphs. Please follow the guidelines set out in the author ship guidelines on Data Presentation.

**2. Captions****Each figure caption should contain the following information, for each panel where they are relevant:**

- a specification of the experimental system investigated (eg cell line, species name).
- the assay(s) and method(s) used to carry out the reported observations and measurements
- an explicit mention of the biological and chemical entity(ies) that are being measured.
- an explicit mention of the biological and chemical entity(ies) that are altered/ varied/ perturbed in a controlled manner.
- the exact sample size (n) for each experimental group/condition, given as a number, not a range;
- a description of the sample collection allowing the reader to understand whether the samples represent technical or biological replicates (including how many animals, litters, cultures, etc.).
- a statement of how many times the experiment shown was independently replicated in the laboratory.
- definitions of statistical methods and measures:
  - common tests, such as t-test (please specify whether paired vs. unpaired), simple  $\chi^2$  tests, Wilcoxon and Mann-Whitney tests, can be unambiguously identified by name only, but more complex techniques should be described in the methods section;
  - are tests one-sided or two-sided?
  - are there adjustments for multiple comparisons?
  - exact statistical test results, e.g., P values = x but not P values < x;
  - definition of 'center values' as median or average;
  - definition of error bars as s.d. or s.e.m.

Any descriptions too long for the figure legend should be included in the methods section and/or with the source data.

Please ensure that the answers to the following questions are reported in the manuscript itself. We encourage you to include a specific subsection in the methods section for statistics, reagents, animal models and human subjects.

In the pink boxes below, provide the page number(s) of the manuscript draft or figure legend(s) where the information can be located. Every question should be answered. If the question is not relevant to your research, please write NA (non applicable).

**USEFUL LINKS FOR COMPLETING THIS FORM**

|                                                                                                                                                                                             |                                                         |
|---------------------------------------------------------------------------------------------------------------------------------------------------------------------------------------------|---------------------------------------------------------|
| <a href="http://www.antibodypedia.com">http://www.antibodypedia.com</a>                                                                                                                     | Antibodypedia                                           |
| <a href="http://1degreebio.org">http://1degreebio.org</a>                                                                                                                                   | 1DegreeBio                                              |
| <a href="http://www.equator-network.org/reporting-guidelines/improving-bioscience-research-repo">http://www.equator-network.org/reporting-guidelines/improving-bioscience-research-repo</a> | ARRIVE Guidelines                                       |
| <a href="http://grants.nih.gov/grants/olaw/olaw.htm">http://grants.nih.gov/grants/olaw/olaw.htm</a>                                                                                         | NIH Guidelines in animal use                            |
| <a href="http://www.mrc.ac.uk/Ourresearch/Ethicsresearchguidance/Useofanimals/index.htm">http://www.mrc.ac.uk/Ourresearch/Ethicsresearchguidance/Useofanimals/index.htm</a>                 | MRC Guidelines on animal use                            |
| <a href="http://ClinicalTrials.gov">http://ClinicalTrials.gov</a>                                                                                                                           | Clinical Trial registration                             |
| <a href="http://www.consort-statement.org">http://www.consort-statement.org</a>                                                                                                             | CONSORT Flow Diagram                                    |
| <a href="http://www.consort-statement.org/checklists/view/32-consort/66-title">http://www.consort-statement.org/checklists/view/32-consort/66-title</a>                                     | CONSORT Check List                                      |
| <a href="http://www.equator-network.org/reporting-guidelines/reporting-recommendations-for-tur">http://www.equator-network.org/reporting-guidelines/reporting-recommendations-for-tur</a>   | REMARK Reporting Guidelines (marker prognostic studies) |
| <a href="http://datadryad.org">http://datadryad.org</a>                                                                                                                                     | Dryad                                                   |
| <a href="http://figshare.com">http://figshare.com</a>                                                                                                                                       | Figshare                                                |
| <a href="http://www.ncbi.nlm.nih.gov/gap">http://www.ncbi.nlm.nih.gov/gap</a>                                                                                                               | dbGAP                                                   |
| <a href="http://www.ebi.ac.uk/ega">http://www.ebi.ac.uk/ega</a>                                                                                                                             | EGA                                                     |
| <a href="http://biomodels.net/">http://biomodels.net/</a>                                                                                                                                   | Biomodels Database                                      |
| <a href="http://biomodels.net/miriam/">http://biomodels.net/miriam/</a>                                                                                                                     | MIRIAM Guidelines                                       |
| <a href="http://jill.biochem.sun.ac.za">http://jill.biochem.sun.ac.za</a>                                                                                                                   | JWS Online                                              |
| <a href="http://oba.od.nih.gov/biossecurity/biossecurity_documents.html">http://oba.od.nih.gov/biossecurity/biossecurity_documents.html</a>                                                 | Biossecurity Documents from NIH                         |
| <a href="http://www.selectagents.gov/">http://www.selectagents.gov/</a>                                                                                                                     | List of Select Agents                                   |

**B- Statistics and general methods**

Please fill out these boxes. (Do not worry if you cannot see all your text once you press return)

|                                                                                                                                                                                         |                                                                                                                                                                                                                                                               |
|-----------------------------------------------------------------------------------------------------------------------------------------------------------------------------------------|---------------------------------------------------------------------------------------------------------------------------------------------------------------------------------------------------------------------------------------------------------------|
| 1.a. How was the sample size chosen to ensure adequate power to detect a pre-specified effect size?                                                                                     | Sample sizes for DNA fiber analyses were decided based on previous publications using same technique.                                                                                                                                                         |
| 1.b. For animal studies, include a statement about sample size estimate even if no statistical methods were used.                                                                       | NA                                                                                                                                                                                                                                                            |
| 2. Describe inclusion/exclusion criteria if samples or animals were excluded from the analysis. Were the criteria pre-established?                                                      | For flow cytometry analysis presented in Fig 3, 4, 5, EV2, EV3, and EV4A, doublets were eliminated using a pre-established method (detailed in the Materials and Methods section).                                                                            |
| 3. Were any steps taken to minimize the effects of subjective bias when allocating animals/samples to treatment (e.g. randomization procedure)? If yes, please describe.                | NA                                                                                                                                                                                                                                                            |
| For animal studies, include a statement about randomization even if no randomization was used.                                                                                          | NA                                                                                                                                                                                                                                                            |
| 4.a. Were any steps taken to minimize the effects of subjective bias during group allocation or/and when assessing results (e.g. blinding of the investigator)? If yes please describe. | Quantification of microscopic data was automated based on predefined procedure (Fig EV5A).                                                                                                                                                                    |
| 4.b. For animal studies, include a statement about blinding even if no blinding was done                                                                                                | NA                                                                                                                                                                                                                                                            |
| 5. For every figure, are statistical tests justified as appropriate?                                                                                                                    | Yes                                                                                                                                                                                                                                                           |
| Do the data meet the assumptions of the tests (e.g., normal distribution)? Describe any methods used to assess it.                                                                      | Yes. Data presented in Fig EV 4B were first checked by F test for equal variance, and were further tested by two-tailed t-test. Mann-Whitney-Wilcoxon test was employed for data presented in Fig 6 because the distributions do not fit normal distribution. |
| Is there an estimate of variation within each group of data?                                                                                                                            | Yes                                                                                                                                                                                                                                                           |
| Is the variance similar between the groups that are being statistically compared?                                                                                                       | Yes. For the data presented in Fig EV 4B, variances of two populations were compared by F test to confirm equal variance.                                                                                                                                     |

**C- Reagents**

|                                                                                                                                                                                                                                                                                                                              |                                                                                                                  |
|------------------------------------------------------------------------------------------------------------------------------------------------------------------------------------------------------------------------------------------------------------------------------------------------------------------------------|------------------------------------------------------------------------------------------------------------------|
| 6. To show that antibodies were profiled for use in the system under study (assay and species), provide a citation, catalog number and/or clone number, supplementary information or reference to an antibody validation profile, e.g., Antibodypedia (see link list at top right), 1DegreeBio (see link list at top right). | Catalog numbers and clone numbers (for monoclonal antibodies) are detailed in the Materials and Methods section. |
| 7. Identify the source of cell lines and report if they were recently authenticated (e.g., by STR profiling) and tested for mycoplasma contamination.                                                                                                                                                                        | Details are given in the Materials and Methods section.                                                          |

\* For all hyperlinks, please see the table at the top right of the document

**D- Animal Models**

|                                                                                                                                                                                                                                                                                                                                                                                    |    |
|------------------------------------------------------------------------------------------------------------------------------------------------------------------------------------------------------------------------------------------------------------------------------------------------------------------------------------------------------------------------------------|----|
| 8. Report species, strain, gender, age of animals and genetic modification status where applicable. Please detail housing and husbandry conditions and the source of animals.                                                                                                                                                                                                      | NA |
| 9. For experiments involving live vertebrates, include a statement of compliance with ethical regulations and identify the committee(s) approving the experiments.                                                                                                                                                                                                                 | NA |
| 10. We recommend consulting the ARRIVE guidelines (see link list at top right) (PLoS Biol. 8(6), e1000412, 2010) to ensure that other relevant aspects of animal studies are adequately reported. See author guidelines, under 'Reporting Guidelines'. See also: NIH (see link list at top right) and MRC (see link list at top right) recommendations. Please confirm compliance. | NA |

**E- Human Subjects**

|                                                                                                                                                                                                                                                         |    |
|---------------------------------------------------------------------------------------------------------------------------------------------------------------------------------------------------------------------------------------------------------|----|
| 11. Identify the committee(s) approving the study protocol.                                                                                                                                                                                             | NA |
| 12. Include a statement confirming that informed consent was obtained from all subjects and that the experiments conformed to the principles set out in the WMA Declaration of Helsinki and the Department of Health and Human Services Belmont Report. | NA |
| 13. For publication of patient photos, include a statement confirming that consent to publish was obtained.                                                                                                                                             | NA |

|                                                                                                                                                                                                                                                                                                                    |    |
|--------------------------------------------------------------------------------------------------------------------------------------------------------------------------------------------------------------------------------------------------------------------------------------------------------------------|----|
| 14. Report any restrictions on the availability (and/or on the use) of human data or samples.                                                                                                                                                                                                                      | NA |
| 15. Report the clinical trial registration number (at ClinicalTrials.gov or equivalent), where applicable.                                                                                                                                                                                                         | NA |
| 16. For phase II and III randomized controlled trials, please refer to the CONSORT flow diagram (see link list at top right) and submit the CONSORT checklist (see link list at top right) with your submission. See author guidelines, under 'Reporting Guidelines'. Please confirm you have submitted this list. | NA |
| 17. For tumor marker prognostic studies, we recommend that you follow the REMARK reporting guidelines (see link list at top right). See author guidelines, under 'Reporting Guidelines'. Please confirm you have followed these guidelines.                                                                        | NA |

#### F- Data Accessibility

|                                                                                                                                                                                                                                                                                                                                                                                                                                                                                                                                                                                                                                                                                                  |                                                                                                                                         |
|--------------------------------------------------------------------------------------------------------------------------------------------------------------------------------------------------------------------------------------------------------------------------------------------------------------------------------------------------------------------------------------------------------------------------------------------------------------------------------------------------------------------------------------------------------------------------------------------------------------------------------------------------------------------------------------------------|-----------------------------------------------------------------------------------------------------------------------------------------|
| 18. Provide accession codes for deposited data. See author guidelines, under 'Data Deposition'.<br>Data deposition in a public repository is mandatory for:<br>a. Protein, DNA and RNA sequences<br>b. Macromolecular structures<br>c. Crystallographic data for small molecules<br>d. Functional genomics data<br>e. Proteomics and molecular interactions                                                                                                                                                                                                                                                                                                                                      | NA                                                                                                                                      |
| 19. Deposition is strongly recommended for any datasets that are central and integral to the study; please consider the journal's data policy. If no structured public repository exists for a given data type, we encourage the provision of datasets in the manuscript as a Supplementary Document (see author guidelines under 'Expanded View' or in unstructured repositories such as Dryad (see link list at top right) or Figshare (see link list at top right)).                                                                                                                                                                                                                          | NA                                                                                                                                      |
| 20. Access to human clinical and genomic datasets should be provided with as few restrictions as possible while respecting ethical obligations to the patients and relevant medical and legal issues. If practically possible and compatible with the individual consent agreement used in the study, such data should be deposited in one of the major public access-controlled repositories such as dbGAP (see link list at top right) or EGA (see link list at top right).                                                                                                                                                                                                                    | NA                                                                                                                                      |
| 21. As far as possible, primary and referenced data should be formally cited in a Data Availability section. Please state whether you have included this section.<br><br>Examples:<br><b>Primary Data</b><br>Weitzme KX, Deutschbauer AM, Price MN, Arkin AP (2012). Comparison of gene expression and mutant fitness in <i>Shewanella oneidensis</i> MR-1. Gene Expression Omnibus GSE39462<br><b>Referenced Data</b><br>Huang J, Brown AF, Lei M (2012). Crystal structure of the TRBD domain of TERT and the CRA/5 of TR. Protein Data Bank 4026.<br>AP-MS analysis of human histone deacetylase interactions in CEM-T cells [2013]. PRIDE PX0000208                                          | NA                                                                                                                                      |
| 22. Computational models that are central and integral to a study should be shared without restrictions and provided in a machine-readable form. The relevant accession numbers or links should be provided. When possible, standardized format (SBML, CellML) should be used instead of scripts (e.g. MATLAB). Authors are strongly encouraged to follow the MIRIAM guidelines (see link list at top right) and deposit their model in a public database such as Biomedels (see link list at top right) or JWS Online (see link list at top right). If computer source code is provided with the paper, it should be deposited in a public repository or included in supplementary information. | The pipeline file for CellProfiler software used to analyse the data presented in Fig EV5A is included in the Supplemental Information. |

#### G- Dual use research of concern

|                                                                                                                                                                                                                                                                                               |    |
|-----------------------------------------------------------------------------------------------------------------------------------------------------------------------------------------------------------------------------------------------------------------------------------------------|----|
| 23. Could your study fall under dual use research restrictions? Please check biosecurity documents (see link list at top right) and list of select agents and toxins (APHIS/CDC) (see link list at top right). According to our biosecurity guidelines, provide a statement only if it could. | NA |
|-----------------------------------------------------------------------------------------------------------------------------------------------------------------------------------------------------------------------------------------------------------------------------------------------|----|
